# Supplementary material
Source: PubMed Central journal article supplement (PMC6802493)
Supplement: jamaneurol-77-192-s001.pdf [file jamaneurol-77-192-s001.pdf]

## Supplementary Online Content

Faustino PR, Duarte GS, Chendo I, et al. Risk of developing Parkinson disease in bipolar disorder: a systematic review and meta-analysis. *JAMA Neurol*. Published online October 14, 2019. doi:10.1001/jamaneurol.2019.3446

**eMethods.** Search strategies

**eTable.** 95% CIs of  $I^2$  estimates

This supplementary material has been provided by the authors to give readers additional information about their work.

## **eMethods.** Search strategies

### Strategy on MEDLINE

1. epidemiologic methods/
2. limit 4 to yr=1966-1989
3. exp case-control studies/
4. (case\$ and control\$).tw.
5. or/1-3,5-7
6. Parkinson Disease.mh.
7. Parkinson\*.ti,ab.
8. OR/9-10
9. Exp Bipolar Disorder/
10. Exp Mania/
11. OR/12-13
12. 8 and 11 and 14

### Strategy on Embase

1. exp cohort analysis/
2. exp longitudinal study/
3. exp prospective study/
4. exp follow up/
5. cohort\$.tw.
6. exp case control study/
7. (case\$ and control\$).tw.
8. or/1-7
9. exp Parkinson Disease/
10. Parkinson\*.ti,ab.
11. OR/9-10
12. Exp Bipolar Disorder/
13. Exp Mania/
14. OR/12-13
15. 8 and 11 and 14

**eTable.** 95% CIs of  $I^2$  estimates

| Analysis                                                   | Odds ratio | Lower 95% confidence interval | Upper 95% confidence interval | $I^2$ (%) | Lower 95% confidence interval | Upper 95% confidence interval |
|------------------------------------------------------------|------------|-------------------------------|-------------------------------|-----------|-------------------------------|-------------------------------|
| <b>Overall analysis</b>                                    | 3.35       | 2.00                          | 5.60                          | 92        | 90                            | 94                            |
| <b>Sensitivity analysis excluding high-bias studies</b>    | 3.21       | 1.89                          | 5.45                          | 94        | 91                            | 95                            |
| <b>Sensitivity analysis excluding Lin et al 2014</b>       | 2.99       | 1.50                          | 5.98                          | 93        | 91                            | 95                            |
| <b>Sensitivity analysis including Kilbourne et al 2004</b> | 2.42       | 1.35                          | 4.33                          | 93        | 92                            | 95                            |
| <b>Subgroup Cohort studies</b>                             | 3.12       | 1.66                          | 5.88                          | 95        | 93                            | 97                            |
| <b>Subgroup Cross-sectional studies</b>                    | 3.61       | 2.33                          | 5.60                          | 0         | 0                             | 0                             |
| <b>Subgroup BD clearly established before PD</b>           | 3.12       | 1.66                          | 5.88                          | 95        | 93                            | 97                            |
| <b>Subgroup BD not clearly established before PD</b>       | 3.61       | 2.33                          | 5.60                          | 0         | 0                             | 0                             |

|                                                             |      |      |      |    |   |    |
|-------------------------------------------------------------|------|------|------|----|---|----|
| <b>Subgroup<br/>Follow-up <math>\geq</math> 9<br/>years</b> | 1.75 | 1.36 | 2.26 | 0  | 0 | 0  |
| <b>Subgroup<br/>Follow-up &lt; 9<br/>years</b>              | 5.20 | 4.26 | 6.35 | 34 | 1 | 56 |

Abbreviations: BD, bipolar disorder; PD, Parkinson disease.
